# Supplementary material for: Fabrication of poly(4-vinylpyridine)-b-polystyrene-b-poly(4-vinylpyridine) triblock copolymer particles via three-dimensional soft confined self-assembly
Source: Royal Society of Chemistry journal article supplement (doi:10.1039/d3py01183f), 2023-11-23
Supplement: d3py01183f1.pdf [file d3py01183f1.pdf]

## Supporting Information

### **Fabrication of poly(4-vinylpyridine)-*b*-polystyrene-*b*-poly(4-vinylpyridine) triblock copolymer particles via three-dimensional soft confined self-assembly**

*Lei Guo<sup>a</sup>, Dingli Xia<sup>a</sup>, Yaping Wang<sup>b</sup>, Shipeng Ding<sup>a</sup>, Junting Xu<sup>a</sup>, Yutian Zhu<sup>b</sup>, Binyang Du<sup>a</sup> \**

<sup>a</sup>National Key Laboratory of Biobased Transportation Fuel Technology, Department of Polymer Science & Engineering, Zhejiang University, Hangzhou 310058, China

<sup>b</sup>College of Material, Chemistry and Chemical Engineering, Key Laboratory of Organosilicon Chemistry and Material Technology, Ministry of Education, Key Laboratory of Organosilicon Material Technology, Hangzhou Normal University, Hangzhou 311121, China

\*Corresponding author. E-mail: [duby@zju.edu.cn](mailto:duby@zju.edu.cn).

## CONTENTS:

1. Synthesis routine of P4VP-b-PS-b-P4VP triblock copolymers (**Scheme S1**).
2. Characteristics of  $S_{12.2k}V_n$  diblock copolymers (**Table S1**).
3. GPC traces of CTA- $PS_{24.2k}$ -CTA (**Figure S1**),  $PS_{12.2k}$ -CTA (**Figure S2**) and  $S_{12.2k}V_n$  diblock copolymers (**Figure S3**).
4.  $^1\text{H-NMR}$  spectra of  $PS_{12.2k}$ -CTA and  $S_{12.2k}V_n$  diblock copolymers (**Figure S4**).
5. SEM images of  $S_{12.2k}V_{3.7k}$  triblock copolymer particles obtained via 3D-SCSA with various CTAB concentrations (mg/mL) of (a) 0.1, (b) 0.5, (c) 1.0 and SEM images of  $S_{12.2k}V_{12k}$  diblock copolymer particles obtained via 3D-SCSA with various CTAB concentration (mg/mL) of (d) 0.1, (e) 0.5, (f) 1.0 (**Figure S5**).

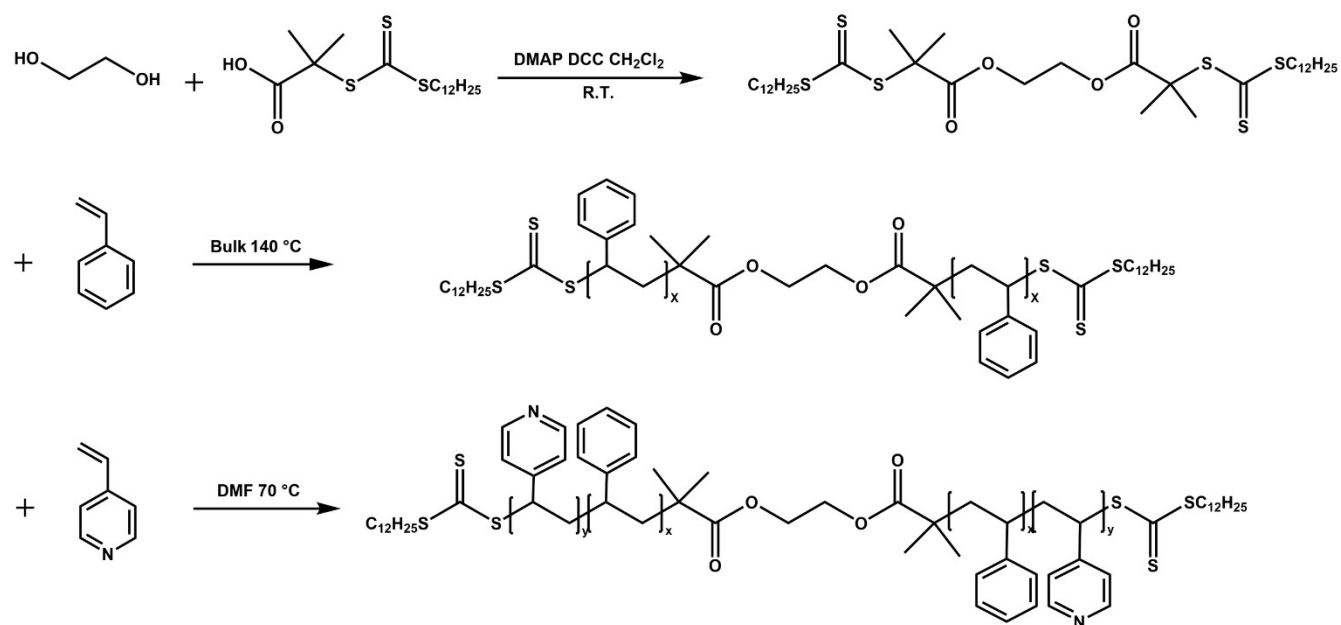

**Scheme S1.** Synthesis routine of P4VP-*b*-PS-*b*-P4VP triblock copolymers.

**Table S1.** Characteristics of  $S_{12.2k}V_n$  diblock copolymers.

| Sample <sup>a</sup>  | $f_{PS}^b$ | $f_{P4VP}^b$ | $\mathcal{D}^c$ |
|----------------------|------------|--------------|-----------------|
| $S_{12.2k}V_{3.7k}$  | 77.8       | 22.2         | 1.09            |
| $S_{12.2k}V_{12.0k}$ | 51.5       | 48.4         | 1.17            |

<sup>a</sup>Determined by <sup>1</sup>H NMR. <sup>b</sup>*f* represents the volume fraction of PS or P4VP blocks. The densities of PS and P4VP are 1.05 g/cm<sup>3</sup> and 1.10 g/cm<sup>3</sup>, respectively. <sup>c</sup>Polydispersity indexes ( $\mathcal{D}$ ) were obtained by GPC.

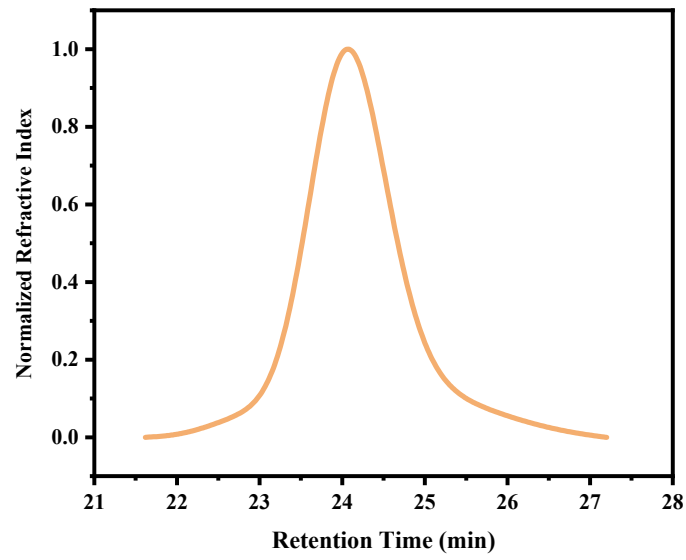

**Figure S1.** GPC trace of CTA-PS<sub>24.2k</sub>-CTA.

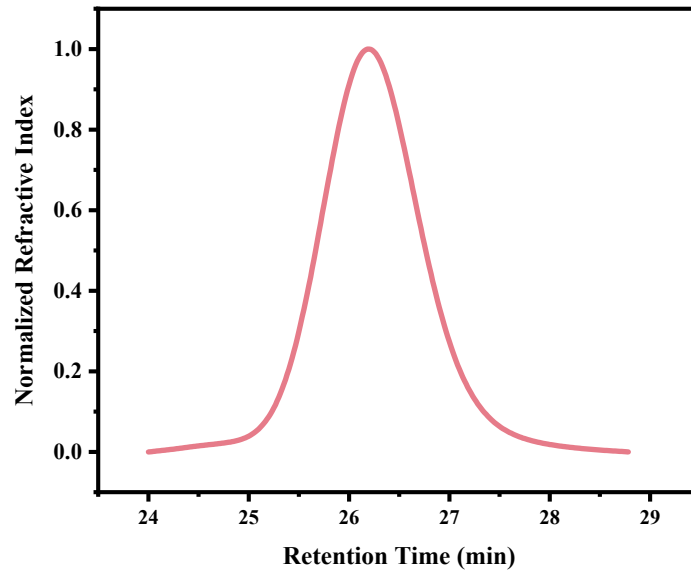

**Figure S2.** GPC trace of PS<sub>12.2k</sub>-CTA.

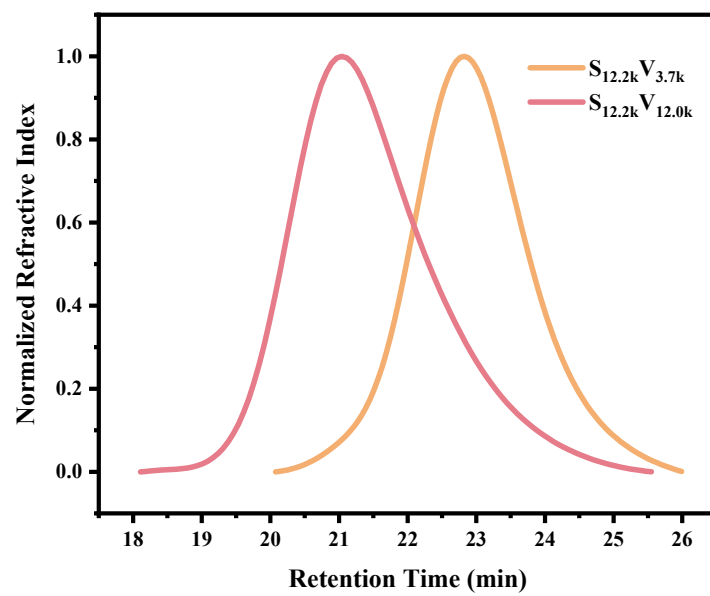

**Figure S3.** GPC traces of  $S_{12.2k}V_n$  diblock copolymers.

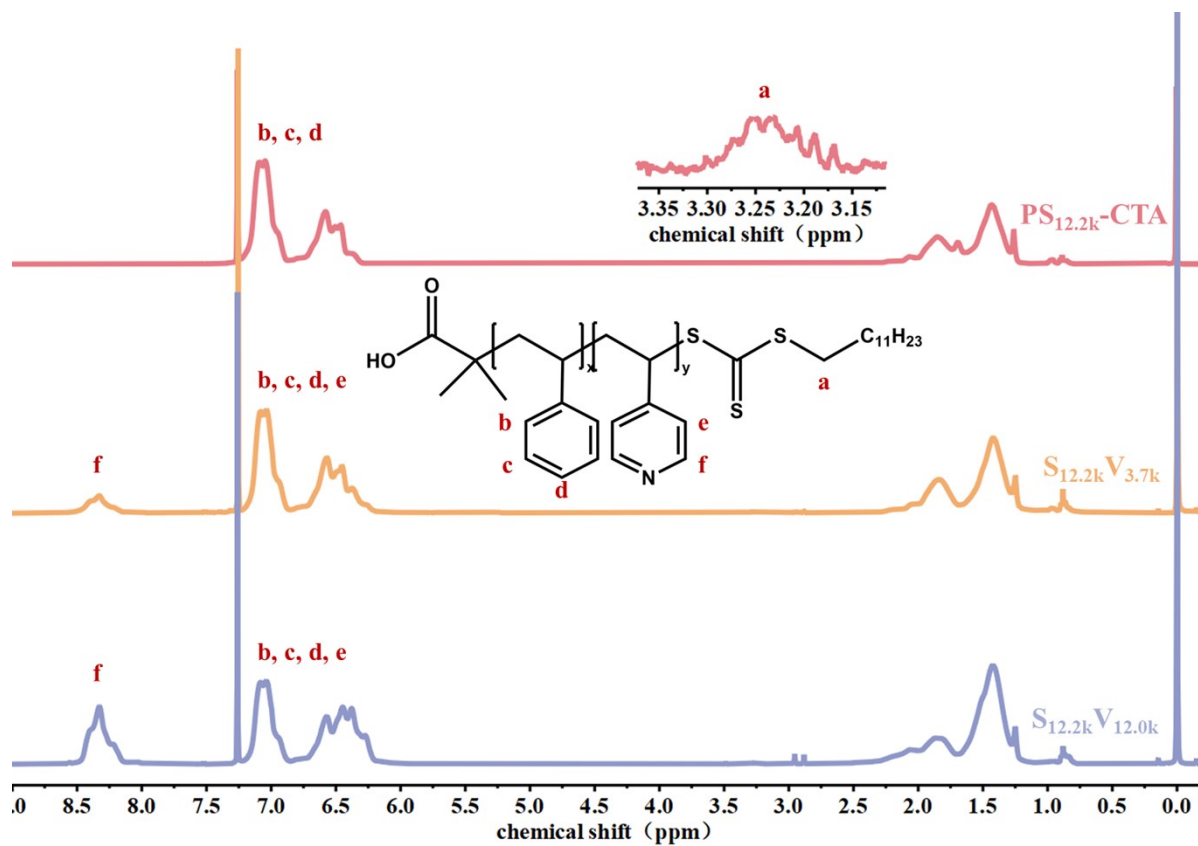

**Figure S4.** <sup>1</sup>H NMR spectra of PS<sub>12.2k</sub>-CTA and S<sub>12.2k</sub>V<sub>n</sub> diblock copolymer in CDCl<sub>3</sub>.

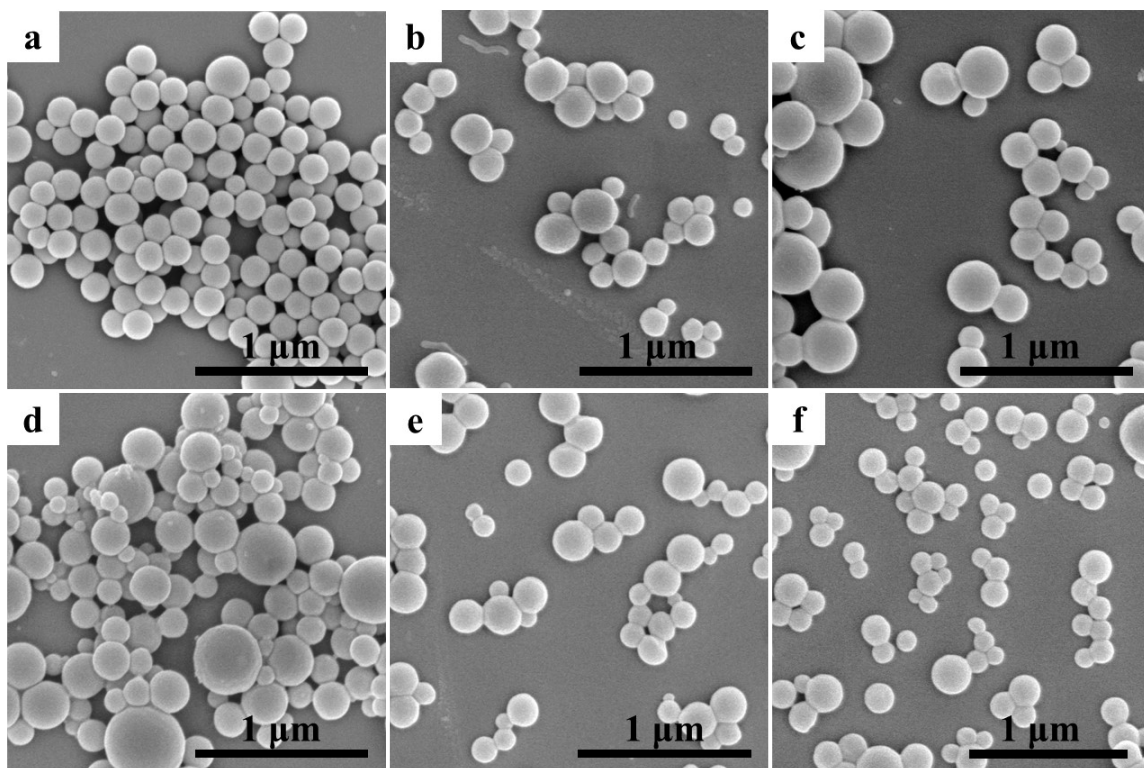

**Figure S5.** SEM images of  $S_{12.2k}V_{3.7k}$  diblock copolymer particles obtained via 3D-SCSA with various CTAB concentration (mg/mL) of (a) 0.1, (b) 0.5, and (c) 1.0. SEM images of  $S_{12.2k}V_{12.0k}$  diblock copolymer particles obtained via 3D-SCSA with various CTAB concentration (mg/mL) of (d) 0.1, (e) 0.5, and (f) 1.0.
